# Supplementary material for: The role of JAGGED in shaping lateral organs
Source: Oxford University Press journal article supplement (doi:10.1242/dev.00949), 2004-02-18
Supplement: dev00949-sup-tables1.pdf [file dev00949-sup-tables1.pdf]

**Table S1. Oligonucleotides**

| Oligonucleotide name | Sequence 5' to 3'                       |
|----------------------|-----------------------------------------|
| JL202                | CAT TTT ATA ATA ACG CTG CGG ACA TCT AC  |
| N-0335               | CAA GAG ACA ATG ATT CG                  |
| N-0336               | AGT ACA CAT CCA TGA TG                  |
| N-0680               | AAG CTT CTC TCA TTT CCC ACT ATG AGG     |
| N-0681               | GGA TCC AAC TCA GAG CGA GTG ATG ATC TTG |
| N-1136               | GGA CAA GCT GGG ATC CAG G               |
| N-1137               | CGT CTC CAC CTT CAG CAC C               |
| N-1365               | AGG ATC ACA AGT TCA TCA AGG ACC ATC TT  |
| N-1366               | ATT AAT TTG TCC GGT TCC TCT CTG TCC TC  |
| N-1413               | CTG CAG CGA GCG AGT GAT GAT CTT GAA ACC |
| N-1509               | TT TAG CTA CGC ATG TGG TCA              |
| N-1510               | TGT GGT GGA TAA CGG ACG TA              |
| oJD119               | AAG CTT ATG AGA GCT GAT GAA AAT AAC AC  |
| oJD119               | AAG CTT ATG AGA GCT GAT GAA AAT AAC AC  |
| oJD120               | GGA TCC TTA TAG CCC ATG ATG TGG AGG     |
| oJD120               | GGA TCC TTA TAG CCC ATG ATG TGG AGG     |
| oJD126               | TTA GTT TCC ACA CGC AGA GAG AG          |
| oJD127               | TCA TGT GGC CAC CAA GAG CTT G           |
| oJD133               | ACA CGG ATC GAT ATC TCA GCC             |
| oJD134               | CAC CGA ATC CGT AAA GAG TCC             |
| SKC12                | TTG ACA GTG ACG ACA AAT CG              |

**Table S2. Measurements of wild-type and *jag-1* rosette leaf blades**

| Genotype     | <i>n</i> | Area (mm <sup>2</sup> ) | Perimeter (mm) | Perimeter/Area (mm <sup>-1</sup> ) |
|--------------|----------|-------------------------|----------------|------------------------------------|
| Col-0        | 24       | 70.51±1.55              | 30.94±0.36     | 0.44±0.00                          |
| <i>jag-1</i> | 25       | 69.84±2.24              | 32.63±0.57     | 0.47±0.00                          |

Measurements were taken from the third and fourth rosette leaves.  
Values are mean±s.e.m.
